# Supplementary material
Source: MDPI journal article supplement (https://www.mdpi.com/2073-4395/12/2/379)
Supplement: s1 [file s1]

## Article

# Effect of Fertilisation with Ash from Biomass Combustion on the Mechanical Properties of Potato Tubers (*Solanum tuberosum* L.) Grown in Two Types of Soil

Ewa Szpunar-Krok, Małgorzata Szostek, Renata Pawlak, Józef Gorzelany and Dagmara Migut

**Table S1.** Mineral composition of ash from biomass combustion ( $\text{mg} \cdot \text{kg}^{-1}$ ).

| Element | Total forms                      | Available forms* |
|---------|----------------------------------|------------------|
|         | $\text{mg} \cdot \text{kg}^{-1}$ |                  |
| Ca      | 145081                           | -                |
| Cd      | 2.682                            | 0.972            |
| Co      | 1.068                            | 0.502            |
| Cr      | 448.39                           | 32.08            |
| Cu      | 535.6                            | 157.25           |
| Fe      | 4351                             | 22.89            |
| Hg      | <0.01                            | -                |
| K       | 129617                           | 187.75           |
| Mg      | 13512                            | 76.4             |
| Mn      | 1490                             | 263.5            |
| Na      | 1452                             | -                |
| Ni      | 20.30                            | 4.59             |
| P       | 9244                             | 15.06            |
| Pb      | 129.5                            | 3.39             |
| Zn      | 423.0                            | 394.6            |

\*Available forms of P and K - in 0.4 M  $\text{CH}_3\text{CHO}\cdot\text{H}\cdot\text{COO})_2\text{Ca}$  solution pH=3.6; Available forms of Mg - in 0.1 M  $\text{CaCl}_2$  solution; Available forms of Fe, Mn, Zn, Cu, Cr, Co, Ni, Pb, Cd – in 1M HCl solution.

**Table S2.** Morphological features of analysed potato tubers according to soil type and fertilization in the study years 2019-2021.

| Variables        |         | Weight of<br>1 tuber (g) | Dimensions (mm) |          |           | Sphericity<br>(%) | Flattening<br>factor $W_c$ | Elongation<br>factor $W_a$ |
|------------------|---------|--------------------------|-----------------|----------|-----------|-------------------|----------------------------|----------------------------|
|                  |         |                          | Length          | Width    | Thickness |                   |                            |                            |
| Gleyic Chernozem | Control | 40.2±9.1*                | 39.4±3.9        | 35.8±2.1 | 32.6±2.9  | 88.9±3.0          | 1.17±0.04                  | 1.31±0.06                  |
|                  | D1      | 74.9±15.1                | 53.7±7.7        | 44.7±4.5 | 39.3±3.6  | 86.0±4.1          | 1.18±0.03                  | 1.32±0.05                  |
|                  | D2      | 52.1±14.3                | 55.4±5.1        | 47.9±4.1 | 38.6±4.0  | 88.1±3.7          | 1.18±0.01                  | 1.28±0.10                  |
|                  | D3      | 62.3±22.0                | 56.0±11.4       | 46.8±7.6 | 38.5±4.8  | 85.7±4.1          | 1.19±0.01                  | 1.34±0.05                  |
|                  | D4      | 63.9±22.0                | 55.7±7.8        | 48.4±3.4 | 39.7±4.5  | 87.0±5.3          | 1.17±0.05                  | 1.35±0.14                  |
|                  | D5      | 62.0±18.0                | 48.6±4.7        | 43.5±4.8 | 37.1±3.8  | 87.1±2.2          | 1.20±0.07                  | 1.36±0.05                  |

|                |      |         |            |           |           |           |          |           |           |
|----------------|------|---------|------------|-----------|-----------|-----------|----------|-----------|-----------|
| Haplic Luvisol | 2020 | D6      | 71.2±19.1  | 46.0±6.6  | 42.4±5.3  | 37.1±4.4  | 87.0±4.6 | 1.21±0.03 | 1.41±0.04 |
|                |      | Control | 76.6±15.3  | 51.6±7.2  | 37.5±3.2  | 38.0±5.8  | 78.2±2.9 | 1.09±0.01 | 1.52±0.05 |
|                |      | D1      | 84.3±20.0  | 66.4±4.4  | 44.4±3.0  | 42.0±4.1  | 74.9±2.7 | 1.11±0.02 | 1.60±0.11 |
|                |      | D2      | 87.3±14.7  | 57.5±5.7  | 39.2±2.0  | 40.0±4.3  | 75.9±4.2 | 1.07±0.03 | 1.58±0.05 |
|                |      | D3      | 98.9±12.8  | 58.8±5.1  | 41.3±4.3  | 41.5±5.5  | 76.8±2.9 | 1.10±0.03 | 1.55±0.10 |
|                |      | D4      | 125.0±45.2 | 57.7±6.0  | 39.6±1.0  | 42.2±6.8  | 75.7±4.9 | 1.11±0.02 | 1.64±0.15 |
|                |      | D5      | 106.8±23.0 | 66.1±2.9  | 43.8±2.2  | 43.1±4.0  | 75.0±2.2 | 1.07±0.05 | 1.55±0.10 |
|                | 2021 | D6      | 92.5±46.4  | 57.3±4.1  | 40.5±1.6  | 39.8±5.2  | 74.8±6.4 | 1.12±0.01 | 1.74±0.35 |
|                |      | Control | 89.3±7.1   | 53.6±4.8  | 44.4±3.7  | 41.0±3.2  | 84.6±1.6 | 1.15±0.04 | 1.38±0.06 |
|                |      | D1      | 100.9±31.5 | 61.5±8.3  | 47.9±2.7  | 43.4±3.2  | 83.1±6.4 | 1.15±0.04 | 1.39±0.23 |
|                |      | D2      | 123.7±18.5 | 58.5±1.6  | 48.5±2.0  | 46.8±4.2  | 87.5±2.9 | 1.18±0.04 | 1.28±0.02 |
|                |      | D3      | 173.5±44.0 | 60.5±5.3  | 49.5±4.0  | 77.5±78.1 | 82.8±5.0 | 1.14±0.01 | 1.37±0.09 |
|                |      | D4      | 121.2±38.8 | 59.9±8.9  | 49.0±3.4  | 44.7±4.9  | 83.7±3.3 | 1.18±0.03 | 1.44±0.07 |
|                |      | D5      | 124.1±23.8 | 62.7±3.0  | 52.9±2.6  | 47.4±3.9  | 84.1±4.2 | 1.35±0.38 | 1.55±0.39 |
|                |      | D6      | 122.7±6.9  | 54.8±3.7  | 45.9±2.8  | 43.6±3.6  | 83.5±2.7 | 1.17±0.04 | 1.47±0.09 |
|                | 2019 | Control | 38.7±7.3   | 42.1±5.2  | 37.9±3.7  | 31.1±2.4  | 88.3±2.6 | 1.15±0.03 | 1.27±0.08 |
|                |      | D1      | 64.4±17.7  | 53.5±5.9  | 46.1±3.7  | 38.2±4.0  | 87.9±2.3 | 1.17±0.04 | 1.41±0.15 |
|                |      | D2      | 74.0±10.4  | 50.8±7.6  | 45.2±4.9  | 41.2±2.4  | 89.9±4.2 | 1.16±0.04 | 1.35±0.08 |
|                |      | D3      | 71.0±24.9  | 53.4±9.3  | 45.9±5.9  | 39.1±6.0  | 87.3±2.3 | 1.20±0.04 | 1.43±0.15 |
|                |      | D4      | 72.9±15.9  | 53.2±9.3  | 45.9±5.5  | 42.3±2.5  | 86.4±5.9 | 1.14±0.04 | 1.32±0.14 |
|                |      | D5      | 57.5±8.8   | 50.2±6.1  | 44.6±4.8  | 36.2±3.3  | 86.7±2.3 | 1.20±0.04 | 1.34±0.06 |
|                |      | D6      | 51.1±8.0   | 50.4±7.9  | 44.6±5.5  | 35.4±3.5  | 84.5±1.7 | 1.19±0.04 | 1.30±0.14 |
|                | 2020 | Control | 41.0±11.3  | 57.8±8.8  | 41.8±6.0  | 33.6±2.3  | 78.0±1.8 | 1.12±0.03 | 1.53±0.13 |
|                |      | D1      | 73.4±19.5  | 68.1±5.3  | 46.4±4.1  | 40.2±3.3  | 75.8±3.5 | 1.10±0.02 | 1.65±0.05 |
|                |      | D2      | 55.1±8.6   | 62.7±7.7  | 42.7±4.9  | 36.8±2.6  | 75.6±2.2 | 1.06±0.04 | 1.56±0.16 |
|                |      | D3      | 53.8±9.5   | 65.0±8.4  | 46.1±6.1  | 36.9±3.6  | 77.4±3.0 | 1.12±0.02 | 1.60±0.10 |
|                |      | D4      | 55.4±3.0   | 67.7±15.5 | 45.9±8.4  | 37.2±0.7  | 74.8±4.3 | 1.07±0.05 | 1.55±0.16 |
|                |      | D5      | 64.1±3.5   | 68.9±5.0  | 46.6±4.0  | 39.9±0.6  | 76.4±2.0 | 1.10±0.06 | 1.66±0.09 |
|                |      | D6      | 53.8±5.5   | 66.9±20.3 | 44.4±6.1  | 36.5±1.1  | 72.8±8.5 | 1.11±0.03 | 1.57±0.13 |
|                | 2021 | Control | 67.3±13.1  | 56.2±4.3  | 46.7±3.4  | 39.5±3.6  | 84.5±1.4 | 1.13±0.03 | 1.36±0.05 |
|                |      | D1      | 80.2±14.5  | 62.0±9.8  | 49.7±4.1  | 41.8±1.7  | 84.9±7.4 | 1.14±0.07 | 1.47±0.21 |
|                |      | D2      | 82.2±7.1   | 61.1±4.0  | 53.6±5.7  | 43.7±1.5  | 89.7±0.7 | 1.11±0.01 | 1.34±0.06 |
|                |      | D3      | 88.5±16.8  | 68.0±10.6 | 56.2±8.2  | 41.6±4.4  | 85.0±3.5 | 1.16±0.03 | 1.39±0.05 |
|                |      | D4      | 92.1±24.5  | 63.0±7.7  | 51.8±6.3  | 43.2±3.5  | 83.1±2.8 | 1.14±0.01 | 1.38±0.10 |
|                |      | D5      | 101.7±16.3 | 69.3±15.7 | 59.6±15.7 | 45.8±2.0  | 83.2±6.2 | 1.16±0.05 | 1.37±0.02 |
|                |      | D6      | 70.0±13.4  | 61.5±7.9  | 50.1±5.0  | 40.7±2.3  | 81.7±2.5 | 1.13±0.01 | 1.35±0.04 |

\* Statistics are expressed as mean values ± SD.
